# Supplementary material
Source: PubMed Central journal article supplement (PMC7456619)
Supplement: NIHMS1620910-supplement-1620910_SuppTables1-4.pdf [file NIHMS1620910-supplement-1620910_SuppTables1-4.pdf]

**Supplemental Table 1 - TCGA analysis**

| Gene       | Tumor type       | tp53 WT (n) | tp53 mutant (n) | p-value  | q-value  | Significance |
|------------|------------------|-------------|-----------------|----------|----------|--------------|
| ERAP1      | AML              | 148         | 14              | 8.90E-06 | 5.10E-04 | ***          |
|            | Head&Neck        | 72          | 207             | 5.60E-05 | 7.80E-04 | ***          |
|            | GBM              | 121         | 33              | 0.11     | 0.69     | ns           |
|            | Stomach          | 141         | 117             | 2.60E-04 | 4.60E-03 | ***          |
|            | Lung             | 123         | 107             | 2.60E-03 | 0.02     | **           |
|            | Prostate         | 270         | 20              | 0.06     | 0.3      | ns           |
|            | Liver            | 249         | 111             | 0.05     | 0.11     | ns           |
|            | Bladder          | 212         | 196             | 0.03     | 0.08     | *            |
|            | ER+ Br           | 284         | 98              | 0.09     | 0.16     | ns           |
|            | Endometrial      | 165         | 67              | 0.34     | 0.45     | ns           |
|            | Low Grade Glioma | 257         | 249             | 0.34     | 0.28     | ns           |
|            | ER- Br           | 32          | 142             | 0.99     | 0.99     | ns           |
|            | Melanoma         | 299         | 64              | 0.5      | 0.68     | ns           |
| Colorectal | 133              | 111         | 0.3             | 0.51     | ns       |              |
| TAP1       | GBM              | 121         | 33              | 0.07     | 0.65     | ns           |
|            | Low Grade Glioma | 257         | 249             | 2.10E-04 | 5.05E-04 | ***          |
|            | Head&Neck        | 72          | 207             | 0.47     | 0.61     | ns           |
|            | Prostate         | 270         | 20              | 0.68     | 0.86     | ns           |
|            | Melanoma         | 299         | 64              | 0.87     | 0.93     | ns           |
|            | Stomach          | 141         | 117             | 0.76     | 0.85     | ns           |
|            | Colorectal       | 133         | 111             | 0.56     | 0.73     | ns           |
|            | Lung             | 123         | 107             | 0.24     | 0.43     | ns           |
|            | Endometrial      | 165         | 67              | 0.26     | 0.37     | ns           |
|            | Liver            | 249         | 111             | 0.01     | 0.04     | *            |
|            | Bladder          | 212         | 196             | 0.0009   | 5.10E-03 | ***          |
|            | AML              | 148         | 14              | 2.10E-06 | 1.99E-04 | ***          |
|            | ER+ Br           | 284         | 98              | 2.30E-05 | 1.80E-04 | ***          |
| ER- Br     | 32               | 142         | 0.03            | 0.24     | *        |              |

ns= non-significant

**Supplemental Table 2 - Tumor Lines**

|      | Line                                 | Lab of origin    | PDX/cell line      | subgroup | P53 Status                                              | Reference                                               |
|------|--------------------------------------|------------------|--------------------|----------|---------------------------------------------------------|---------------------------------------------------------|
| MB   | RCMB18                               | R. Wechsler-Reya | PDX                | SHH      | mut : R175H                                             | Brun et al., Oncogene, 2014                             |
|      | ICb984                               | X-N Li           | PDX                | SHH      | mut : R282W                                             | Zhao et al., NeuroOncology, 2012                        |
|      | BT-084                               | T.Milde          | PDX                | SHH      | mut E285K                                               | Unpublished                                             |
|      | MB002                                | J. Cho           | PDX                | G3       | mut : A161T                                             | Bandopadhyay et al., Clinical Cancer Research, 2014     |
|      | Med211                               | J. Olson         | PDX                | G3       | WT                                                      | Girard et al., NeuroOncology, 2015;                     |
|      | RCMB40                               | R. Wechsler-Reya | PDX                | G3       | WT                                                      | Unpublished                                             |
|      | HDMB03                               | T.Milde          | Cell line          | G3       | WT                                                      | Milde et al., Journal of neuro-oncology, 2012           |
|      | ICb1487                              | X-N Li           | PDX                | G4       | WT                                                      | Zhao et al., NeuroOncology, 2012                        |
|      | DMB006                               | R. Wechsler-Reya | PDX                | G4       | WT                                                      | Kool et al., Cancer Cell, 2014                          |
|      | RCMB56                               | R. Wechsler-Reya | fresh tumor sample | SHH      | mut                                                     | Unpublished                                             |
|      | RCMB58                               | R. Wechsler-Reya | fresh tumor sample | G3       | pathway altered :<br>1 allele P53 loss<br>and MDM4 gain | Unpublished                                             |
| DIPG | SF 8628                              | N. Gupta         | Human cell line    | DIPG     | mut                                                     | Hashizume et al., Journal of neuro-oncology, 2012       |
|      | SU-DIPG                              | M. Monje         | Human cell line    | DIPG     | WT                                                      | Caretti et al., Acta Neuropathologica, 2014             |
|      | (PDGF-B; H3.3K27M;<br>p53 loss (Cre) | O. Becher        | Mouse cell line    | DIPG     | p53 deficient                                           | Cordero et al., MCR, 2017                               |
|      | PDGF-B; H3.3K27M                     | O. Becher        | Mouse cell line    | DIPG     | WT                                                      | Cordero et al., MCR, 2017                               |
| AML  | MV4-11                               | ATCC             | Human cell line    | AML      | WT                                                      | Kojima et al., Blood, 2011                              |
|      | MOLM-13                              | ATCC             | Human cell line    | AML      | WT                                                      | Kojima et al., Blood, 2011                              |
|      | THP1                                 | ATCC             | Human cell line    | AML      | mut                                                     | Tsuchiya et al. International Journal of Cancer, 1980   |
|      | ML-2                                 | DSMZ             | Human cell line    | AML      | mut                                                     | Smardova et al., Oncology Report, 2005                  |
|      | U937                                 | ATCC             | Human cell line    | AML      | mut                                                     | Sundstrom et al., International Journal of Cancer, 1976 |
|      | P31                                  | ATCC             | Human cell line    | AML      | mut                                                     | Weisberg et al., Molecular Cancer Therapy, 2015         |
|      | HL60                                 | ATCC             | Human cell line    | AML      | del                                                     | Kojima et al., Blood 2011                               |

Supplemental Table 3 - Antibodies

## For Western-Blotting

| target           | name                                 | species | vendor           | Catalog # | dilution used | Reference                                                   |
|------------------|--------------------------------------|---------|------------------|-----------|---------------|-------------------------------------------------------------|
| TAP1             | Tap1 Polyclonal Antibody             | rabbit  | Bioss Antibodies | bs-2789R  | 1/500         | Stettner <i>et al.</i> , Journal of Neuroinflammation, 2014 |
| ERAP1            | ARTS1 Polyclonal Antibody            | rabbit  | ThermoFisher     | PA5-36218 | 1/1000        | Tested by the company                                       |
| MHC-1            | Anti-MHC Class I H2 Kb/Db antibody   | rabbit  | AbCam            | ab33364   | 1/500         | Maschali <i>et al.</i> , Nat Commun, 2017                   |
| RelA             | Human/Mouse RelA/NFkB p65 Antibody   | mouse   | R&D system       | MA55078   | 1/500         | Qing <i>et al.</i> , Cell Death Dis, 2018                   |
| RelB             | RelB Monoclonal Antibody (F.576.6)   | rabbit  | ThermoFisher     | MA5-14852 | 1/1000        | Tested by the company                                       |
| Actin            | beta-Actin (13E5) Rabbit mAb         | rabbit  | Cell signaling   | 4970S     | 1/1000        | Communal <i>et al.</i> , Proc. Natl. Acad. Sci., 2002       |
| GAPDH            | GAPDH (14C10) Rabbit mAb             | rabbit  | Cell signaling   | 2118S     | 1/2000        | Bae, B.I. <i>et al.</i> , Proc Natl Acad Sci, 2006          |
| HistoneH3        | Histone H3 Antibody                  | rabbit  | Cell signaling   | 9715S     | 1/1000        | Dai <i>et al.</i> , Genes Dev, 2005                         |
| secondary rabbit | Anti-rabbit IgG, HRP-linked Antibody | rabbit  | Cell signaling   | 7074S     | 1/1000        |                                                             |
| secondary mouse  | Anti-mouse IgG, HRP-linked Antibody  | mouse   | Cell signaling   | 7076S     | 1/1000        |                                                             |

## For Flow cytometry

| target                                       | name                                                         | conjugate    | vendor        | Catalog #  | dilution used | Reference                                              |
|----------------------------------------------|--------------------------------------------------------------|--------------|---------------|------------|---------------|--------------------------------------------------------|
| MHC-1                                        | Anti-MHC Class I H2 Kb/Db antibody                           | PE           | eBioscience   | 12-5998-81 | 1/500         | Zhu <i>et al.</i> , Immunity, 2017                     |
| Isotype CII for MHC-1                        | Mouse IgG1 kappa Isotype Control                             | PE           | eBioscience   | 12-4724-81 | 1/500         |                                                        |
| HLA A/B/C                                    | Anti-human HLA-A,B,C [W6/32]                                 | FITC         | Biologend     | 311403     | 1/500         | Fuentes <i>et al.</i> , PLoS ONE, 2013                 |
| Isotype CII for HLA A/B/C                    | Mouse IgG2a, k Isotype CII Antibody                          | FITC         | Biologend     | 400207     | 1/500         |                                                        |
| CD3                                          | CD3 Monoclonal Antibody (17A2)                               | APC          | Biologend     | 100221     | 1/250         | Durgeau <i>et al.</i> , Nature Communication, 2018     |
| Isotype CII for CD3                          | Rat IgG2b kappa Isotype Control, APC                         | APC          | Biologend     | 400623     | 1/250         |                                                        |
| CD8                                          | PE/Cy5 anti-mouse CD8a Antibody                              | Pe-cy5       | Biologend     | 100709     | 1/250         | Sharma <i>et al.</i> , 2018, Cancer Gene Ther          |
| Isotype CII for CD8                          | PE/Cy5 Rat IgG2a, k Isotype CII Antibody                     | Pe-cy5       | Biologend     | 400509     | 1/250         |                                                        |
| B220                                         | CD45R (B220) Monoclonal Antibody (RA3-6B2)                   | PE-cyanine 7 | eBioscience   | 25-0452-82 | 1/250         | Liu <i>et al.</i> , Frontiers in Immunology, 2018      |
| Isotype CII for B220                         | Rat IgG2a kappa Isotype Control                              | PE-cyanine 7 | eBioscience   | 25-4321-82 | 1/250         |                                                        |
| CD11b                                        | Anti-mouse/human CD11b Antibody (M1/70)                      | APC          | eBioscience   | 17-0112-82 | 1/500         | Bou Nasser Eddine <i>et al.</i> , Oncoimmunology, 2016 |
| Isotype CII for CD11b                        | Rat IgG2b, k Isotype CII                                     | APC          | eBioscience   | 17-4031-82 | 1/500         |                                                        |
| NK1.1                                        | NK1.1 Monoclonal Antibody (PK136)                            | PE           | eBioscience   | 12-5941-82 | 1/250         | Teo <i>et al.</i> , Nature Communication, 2018         |
| Isotype CII for NK1.1                        | Mouse IgG2a kappa Isotype Control                            | PE           | eBioscience   | 12-4724-81 | 1/200         |                                                        |
| TNFR2                                        | Mouse TNF RII/TNFRSF1B APC-conjugated Antibody               | APC          | R&D systems   | FAB426A    | 1/500         | Ansa-Addo <i>et al.</i> , J. Clin. Invest, 2017        |
| Isotype CII for TNFR2                        | Hamster IgG Affinity-purified Control Antibody               | APC          | R&D systems   | F0121      | 1/500         |                                                        |
| TNFR1                                        | TNFR1 Monoclonal Antibody (HM104), PE                        | PE           | ThermoFisher  | MA5-17899  | 1/500         | Tested by the company                                  |
| LTBR                                         | PE anti-mouse lymphotxin beta receptor (LTBR) Antibody       | PE           | Biologend     | 134403     | 1/500         | Liang <i>et al.</i> , Autophagy, 2017                  |
| Isotype CII for LTBR and TNFR1 viability dye | PE Rat IgG2a, k Isotype CII Antibody 7-AAD Staining Solution | PE           | Biologend     | 400507     | 1/500         |                                                        |
|                                              |                                                              |              | BD pharmingen | 559925     | 1/1000        | Schmid <i>et al.</i> , Cytometry, 1992                 |

## For ChIP

| target               | name                               | vendor         | Catalog # | quantity per IP | Reference                               |
|----------------------|------------------------------------|----------------|-----------|-----------------|-----------------------------------------|
| p53                  | p53 (1C12) Mouse mAb               | Cell signaling | 2524      | 7.5µg           | Fischer <i>et al.</i> , Oncogene, 2019  |
| Isotype CII for p53  | Normal Rabbit IgG Control          | Cell signaling | 2729      | 7.5µg           |                                         |
| RelA                 | Human/Mouse RelA/NFkB p65 Antibody | R&D system     | AF5078    | 10µg            | Guo <i>et al.</i> , J. Biol. Chem, 2008 |
| Isotype CII for RelA | Normal Sheep IgG Control           | R&D system     | 5-001-A   | 10µg            |                                         |
| p50                  | Human / Mouse NFkB1 Antibody       | R&D system     | AF2697    | 10µg            | Tested by the company                   |
| Isotype CII for p50  | Normal Goat IgG Control            | R&D system     | AB-108-C  | 10µg            |                                         |

Supplemental Table 4 - PCR Primers

PCR primers for p53 sequencing

| Exon  | PCR product size | PCR conditions        | Forward (F) or Reverse (R) | sequence                |
|-------|------------------|-----------------------|----------------------------|-------------------------|
| 2     | 259              | 50 s / 560- 50s / 720 | F                          | CCAGGGTTGGAAAGTGTCTC    |
|       |                  |                       | R                          | GACAAAGAGCAGAAAGTCAGTCC |
| 3 - 4 | 238              | 56                    | F                          | CATGGGACTGACTTTCTGCTC   |
|       |                  |                       | R                          | CTTCATCTGGACCTGGGTCT    |
| 4     | 264              | 56                    | F                          | GGACGATATTGAACAATGGTTC  |
|       |                  |                       | R                          | ATGGAAGCCAGCCCTCAG      |
| 5     | 294              | 60                    | F                          | GCTGCCGTCTCCAGTTGCT     |
|       |                  |                       | R                          | CCAGCCCTGCTGCTCTCCA     |
| 6     | 199              | 56                    | F                          | GGCCTCTGATTCCCTCACTGA   |
|       |                  |                       | R                          | GCCACTGACAACCACCCTTA    |
| 7     | 196              | 56                    | F                          | TGCCACAGGTCTCCCAAGG     |
|       |                  |                       | R                          | AGTGTGCAGGGTGGCAAGTG    |
| 8     | 225              | 56                    | F                          | CCTTACTGCCTCTTGCTTCT    |
|       |                  |                       | R                          | ATAACTGCACCCTGGTCTC     |
| 9     | 152              | 56                    | F                          | GCCTCAGATTCACCTTTATCACC |
|       |                  |                       | R                          | CITTCACCTTGATAAGAGGTCC  |
| 10    | 236              | 60                    | F                          | TGATCCGTCATAAAGTCAACAA  |
|       |                  |                       | R                          | GGAGTAGGGCCAGAAGGG      |
| 11    | 256              | 56                    | F                          | GGCACAGACCCTCTCACTCAT   |
|       |                  |                       | R                          | TGCTTCTGACGCACACCTATT   |

qPCR primers for gene expression

| Target           | Species     | Concentration used | Forward (F) or Reverse (R) | sequence                 |
|------------------|-------------|--------------------|----------------------------|--------------------------|
| Erap1            | mouse       | 600nM              | F                          | TGGCATGTTCCACTGACATT     |
|                  |             |                    | R                          | TAGCCATTCAITCCCAGTT      |
| Erap2            | mouse       | 600nM              | F                          | GGCTATCGATGTCCAGGCTA     |
|                  |             |                    | R                          | CTCAAAACAGGGGAAAGTCCA    |
| ERAP1            | Human       | 600nM              | F                          | GCTGCTAAGGGACCTCATTG     |
|                  |             |                    | R                          | TCTGTACGCACGGCTGATAG     |
| Tap1             | mouse       | 600nM              | F                          | GTTTCATGTTTTGGGGTCCAC    |
|                  |             |                    | R                          | TGCGTGGACTTTGTAGAGA      |
| Tap2             | mouse       | 600nM              | F                          | AGTCATACGGAGGGTATGG      |
|                  |             |                    | R                          | CCTGGTACAGCAGGAAGGAG     |
| TAP1             | Human       | 600nM              | F                          | TCTCACCATAGCCAGTGCAG     |
|                  |             |                    | R                          | TGGAAAACCTCCCTCTCTG      |
| Actin            | Human/mouse | 300nM              | F                          | CCGAGCGTGGCTACAGCTTC     |
|                  |             |                    | R                          | ACCTGGCCGTACGGCAGCTC     |
| m-MHC I H2K(b) F | mouse       | 600nM              | F                          | GCTGGTGAAGCAGAGACTCAG    |
|                  |             |                    | R                          | GGTGACTTTATCTTCAGGCTGCT  |
| m-MHC I H2D(b) F | mouse       | 600nM              | F                          | AGTGGTGTGCAGAGCATTACAA   |
|                  |             |                    | R                          | GGTGACTTCACCTTTAGATCTGGG |
| Inos (Nos2)      | mouse       | 600nM              | F                          | TTCTGTGCTGTCCCAAGTGA     |
|                  |             |                    | R                          | TGAAGAAAACCCCTTGCT       |
| Ido1             | mouse       | 600nM              | F                          | TGGGCAGCTTTCAACTTCT      |
|                  |             |                    | R                          | ATGAAGATGTGGCTTTGCT      |
| Tgfb1            | mouse       | 600nM              | F                          | AAGTTGGCATGGTAGCCCTT     |
|                  |             |                    | R                          | GCCCTGGATACCAACTATTGC    |
| Il10             | mouse       | 600nM              | F                          | TGTCAAATTCATTCATGGCCT    |
|                  |             |                    | R                          | ATCGATTTCTCCCTGTGAA      |
| Arg1             | mouse       | 600nM              | F                          | TTTTTCCAGCAGACCAGCTT     |
|                  |             |                    | R                          | AGAGATTATCGGAGGCCTT      |
| Ctla4            | mouse       | 600nM              | F                          | CACTGAAGGTTGGTCACTT      |
|                  |             |                    | R                          | GCCTTCTAGACTTGGCCCTT     |
| Cd274 (PD-L1)    | mouse       | 600nM              | F                          | GGAACTGAGGGAGAGAACC      |
|                  |             |                    | R                          | AAGACGACTGATGGCAACT      |
| Cd80 (B7-1)      | mouse       | 600nM              | F                          | CTCTTTGTGCTGCTGATTCC     |
|                  |             |                    | R                          | GGAGAGTTGTAACGGCAAGG     |
| Cd86 (B7-2)      | mouse       | 600nM              | F                          | CCTCGGTGCTCAACAGGTAT     |
|                  |             |                    | R                          | TTTCCCTCCTCCACACAAG      |
| Tnfsf18 (GITRL)  | mouse       | 600nM              | F                          | GTCATGTGCCATTTTGAGGA     |
|                  |             |                    | R                          | ATGCTGCTCTGTTCTTTGGG     |
| Cd40             | mouse       | 600nM              | F                          | GCCATCGTGGAGGTACTGTT     |
|                  |             |                    | R                          | CTGCATGGTGTCTTTGCCT      |
| Tnfsf4 (OX-40L)  | mouse       | 600nM              | F                          | CTTTGGATTGGAGGGTCCTT     |
|                  |             |                    | R                          | GGATCAAGGCCAAGATTCAA     |
| Tnfsf9 (CD137L)  | mouse       | 600nM              | F                          | GGCTGTGCCAGTTCAGAGTT     |
|                  |             |                    | R                          | AGACCAGGTCAACCCCTGTTT    |
| Il2ra (CD25)     | mouse       | 600nM              | F                          | CAGTTTAGGATGGTGGCCTT     |
|                  |             |                    | R                          | CTTGTGATGTTGGGGTTTC      |

qPCR primers for ChIP

| IP type     | Target | Species | Concentration used | binding site | Forward (F) or Reverse (R) | sequence               |
|-------------|--------|---------|--------------------|--------------|----------------------------|------------------------|
| p53         | Erap1  | mouse   | 600nM              | promoter     | F                          | TTGCAAAAACAGCATTGAA    |
|             |        |         |                    |              | R                          | TGCTTAGGCCTAGTTCTCAGTG |
|             |        |         |                    | 3'UTR        | F                          | TCCACGATCTGTCTTTGAA    |
|             |        |         |                    |              | R                          | AGGGCAGCCACATTCATTAG   |
|             | Tap1   | mouse   | 600nM              | promoter     | F                          | TGTTACTGAACAAGGGACACAG |
|             |        |         |                    |              | R                          | TTGTGCCCTACCTGAAGGAT   |
|             |        |         |                    | 3'UTR        | F                          | TTTATTTCTGGGGCTCTCAT   |
|             |        |         |                    |              | R                          | CTCAGCGAGGAAGAGAAGGA   |
|             | ERAP1  | Human   | 600nM              | promoter     | F                          | GGACCGAAAAGTAAAAGTGA   |
|             |        |         |                    |              | R                          | GTTTACCCTTTCCCAAGCTC   |
|             |        |         |                    | 3'UTR        | F                          | AAGTCCACAAGCCTAGACG    |
|             |        |         |                    |              | R                          | TTGCCACGACAGAGTACTGG   |
| TAP1        | Human  | 600nM   | promoter           | F            | GGGGTCTGCTTAGAGTCTC        |                        |
|             |        |         |                    | R            | CCAGAGTAAAAGCGAAAAGC       |                        |
|             |        |         | 3'UTR              | F            | CATCAGCCCTGGCTCTAAAC       |                        |
|             |        |         |                    | R            | ACCTCCTTTCCAAGCTCCTC       |                        |
| RelA or p50 | Erap1  | mouse   | 600nM              | promoter     | F                          | GCCTAAGCAAACCTGGGGAAC  |
|             |        |         |                    |              | R                          | GGTGAACATGCAGCACTCCT   |
|             |        |         |                    | 3'UTR        | F                          | TCCACGATCTGTCTTTGAA    |
|             |        |         |                    |              | R                          | AGGGCAGCCACATTCATTAG   |
|             | Tap1   | mouse   | 600nM              | promoter     | F                          | TAGCCAGTAAACCCCACTGC   |
|             |        |         |                    |              | R                          | GGTGAAGAAGGTGCGTCTTT   |
|             |        |         |                    | 3'UTR        | F                          | TTTATTTCTGGGGCTCTCAT   |
|             |        |         |                    |              | R                          | CTCAGCGAGGAAGAGAAGGA   |
